1 Title: Individual identity and environmental conditions explain  
2 different aspects of sleep behaviour in wild boar

3 Running title: **Environmental and individual effects on sleep in the wild**

4 Type of article: *Letter*

5 Authors

6 Euan Mortlock<sup>1</sup>, Václav Silovský<sup>2</sup>, Justine Güldenpfennig<sup>2</sup>, Monika Faltusová<sup>2</sup>, Astrid Olejarz<sup>2</sup>, Luca  
7 Börger<sup>3</sup>, Miloš Ježek<sup>2</sup>, Dómhnall J Jennings<sup>1</sup>, Isabella Capellini<sup>1</sup>

8 Affiliations:

9 <sup>1</sup> *School of Biological Sciences, 19 Chlorine Gardens, Queen's University Belfast, BT9 5DL, Northern*  
10 *Ireland*

11 <sup>2</sup> *Department of Game Management and Wildlife Biology, Faculty of Forestry and Wood Sciences,*  
12 *Czech University of Life Sciences, Kamýcká 129, Prague 6-Suchdol, 165 00, Czech Republic*

13 <sup>3</sup> *Biodiversity Dynamics and Movement Ecology lab (BioMove), Department of Biosciences, Wallace*  
14 *Building, Swansea University, SA2 8PP, Wales*

15 Correspondence to:

16 **EM:** emortlock01@qub.ac.uk

17 **IC:** I.Capellini@qub.ac.uk

18 Word count: Abstract 150; Main text 5,000

19 References: 68

20 Statement of Authorship: EM and IC designed the study. EM, LB, DJ and IC analysed the data. MJ,  
21 VS, AO, JG, and MF collected the data. EM, IC, and DJ wrote the first draft of the manuscript. All  
22 authors contributed to revisions of the final manuscript.

23 Data accessibility statement. The data analysed for this study will be made available in Dryad at  
24 acceptance.

25 **Abstract**

26 Sleep is a fundamental behaviour as it serves vital physiological functions, yet how the sleep of wild  
27 animals is constrained by environmental conditions is poorly understood. Using non-invasive multi-  
28 sensor high-resolution biologgers and a robust classification approach, we quantified multiple  
29 dimensions of sleep in wild boar (*Sus scrofa*), a nocturnally active mammal, monitored for up to a full  
30 annual cycle. In support of the hypothesis that environmental conditions determining  
31 thermoregulatory challenges regulate sleep, we show that on warmer, longer, and more humid days  
32 sleep quality and quantity are reduced, whilst greater snow cover and rainfall promote sleep quality.  
33 Importantly, our study reveals large inter-and intra-individual variation in sleep durations, suggestive  
34 of pace-of-life syndromes. Given the major role that sleep plays in health, our results suggest that  
35 global warming and the associated increase in extreme climatic events are likely to negatively impact  
36 sleep, and consequently health in wildlife, particularly in nocturnal animals.

37

38 **Keywords:** sleep ecology, biologging, double-hierarchical generalised mixed-effects models, pace-of-  
39 life syndrome, wild boar

40

## 41 Introduction

42 Sleep is a behaviour, observed in virtually all animals (Anafi *et al.* 2019), where individuals enter a  
43 state of quiescence in a species-specific posture and require a stronger stimulus to elicit a response  
44 compared to individuals that are in wakeful rest (Cirelli & Tononi 2008). Unlike torpor and  
45 hibernation, sleep is also characterised by a rapid return to the waking state (Tobler 2011). Sleep is  
46 beneficial, being associated with many vital physiological functions. Sleep boosts the immune system  
47 (Opp & Krueger 2015; Besedovsky *et al.* 2019), promotes endocrine production and metabolic  
48 regulation (Spiegel & Leproult 1999; Leproult & Van Cauter 2010; Morris *et al.* 2012; Manzar *et al.*  
49 2014; Medic *et al.* 2017), and supports neural maintenance and cognitive functions, such as memory  
50 consolidation (Walker 2009; Lim & Dinges 2010; Xie 2013; Dzierzewski *et al.* 2018; Klinzing *et al.*  
51 2019). The importance of sleep for the brain and body is further highlighted by the detrimental  
52 health- and cognition-related consequences of sleep loss (sleep deprivation) in both the short and  
53 long-term; likely to mitigate the costs of sleep loss, sleep deprivation is often followed by longer  
54 sleep (sleep rebound) (Kushida 2004). However, sleep has inherent opportunity costs since sleeping  
55 animals cannot engage in fitness enhancing behaviours like foraging or finding mates and is likely  
56 associated with greater risk of predation (Capellini *et al.* 2009). Consistently, phylogenetic  
57 comparative studies using sleep data from laboratory animals demonstrate that sleep durations and  
58 patterns are influenced by species' ecology (e.g. Capellini *et al.* 2008). Sleep has so far been studied  
59 primarily in the laboratory where animals do not experience any of the benefits and costs of sleep  
60 loss. Thus, we know very little about how animals meet their sleep need, and how ecological  
61 conditions constrain sleep, in the wild.

62 Environmental conditions affect both the quantity and quality of sleep in the laboratory  
63 (Harding *et al.* 2020). Light and ambient temperature are well known to influence sleep in humans  
64 and animals, hence they are finely controlled in laboratory studies (Lan *et al.* 2017; Reinhardt 2020).  
65 Specifically, the first stage of deep sleep in mammals, NREM (non-rapid-eye-movement) sleep, is  
66 characterised by low, constant body temperature; a cool ambient temperature thus promotes the

67 onset of sleep, greater sleep efficiency and quality (reduced fragmentation into multiple sleep bouts  
68 and longer sleep bouts) and total sleep duration in the laboratory (Troynikov *et al.* 2018; Harding *et*  
69 *al.* 2020). Conversely, the thermoregulatory challenge presented by high temperature reduces sleep  
70 time, increases sleep fragmentation and reduces sleep quality, and upregulates behaviours that help  
71 thermoregulation (Downs *et al.* 2015; Harding *et al.* 2020). Altogether, this evidence suggests that  
72 environmental conditions, such as daily weather and seasonal changes, should affect sleep in the  
73 wild. Consistently, the few studies in the wild find that temperature affects sleep in natural  
74 environments; high temperature increases time invested in licking, a thermoregulatory behaviour, at  
75 the expense of sleep in fruit bats (*Epomophorus wahlbergi*, Downs *et al.* 2015); king penguins  
76 (*Aptenodytes patagonicus*) sleep less in hotter summer days (Dewasmes *et al.* 2001); and gibbons'  
77 sleep becomes more fragmented at higher temperatures (*Hylobates moloch/pileatus*) (Reyes *et al.*  
78 2021). However, ambient temperature does not appear to influence sleep duration or fragmentation  
79 in baboons (*Papio anubis*) (Loftus *et al.* 2022), although this conclusion may be premature and due  
80 to the limited temperature fluctuation over the month-long recording period of this study.

81           Beyond ambient temperature, wild animals are exposed to many environmental conditions  
82 that change throughout the day and across the year. Humidity can compound the effects of higher  
83 temperatures on sleep, making thermoregulation more difficult by reducing the efficiency of  
84 evaporative cooling (Harding *et al.* 2019; Mota-Rojas *et al.* 2020). Thus, higher humidity should lead  
85 to shorter and more fragmented sleep. As expected, higher humidity reduces sleep duration in  
86 chimpanzees (*Pan troglodytes*) and increases sleep fragmentation in both chimpanzees (Videan  
87 2006) and gibbons (Reyes *et al.* 2021). Conversely, rainfall and snow may promote sleep, by  
88 providing evaporative cooling or increasing the thermal value of bedding sites respectively, although  
89 we highlight that the influence of rainfall and snow on sleep in wild animals has not been studied  
90 (but see Wada *et al.* 2007)

91           Finally, it is well-established that light, and so day length, regulates circadian rhythm, hence  
92   when and how long to sleep (LeGates *et al.* 2014; Yadav *et al.* 2022). Hence, longer day lengths  
93   reduce, whilst shorter day lengths increase, sleep time in humans (Friborg *et al.* 2012; Yetish *et al.*  
94   2015). Similarly, sleep is regulated by sunrise and sunset times in the nocturnal slow loris (*Nycticebus*  
95   *javanicus*, Reinhardt *et al.* 2019). In the wild, sleep timing and duration should thus fluctuate with  
96   changing day lengths, where longer days reduce sleep in diurnal species and increase sleep in  
97   nocturnal species. Further, if light is a cue for sleep or waking, bright moonlight may interfere with  
98   sleep regulation. Consistently, greater illumination from moonlight increases sleep duration in  
99   gibbons and humans, although moonlight does not alter sleep in baboons (Samson *et al.* 2018; Reyes  
100   *et al.* 2021; Loftus *et al.* 2022).

101           Importantly, while some studies in wild animals have found limited evidence that  
102   environmental conditions affect sleep time and patterns, we still do not know how sleep changes  
103   with daily and seasonal environmental variation over the annual cycle. With rare exceptions (Loftus  
104   *et al.* 2022), the few published studies on sleep in wild animals are limited by small sample sizes and  
105   short recording durations. Furthermore, some sleep studies in wild animals employed invasive  
106   recording equipment that requires surgery and recapture, and thus have likely quantified sleep in  
107   stressed individuals. If we are to understand how sleep fits within the activity budget of wild  
108   animals, how it is affected by the environment and natural constraints, and what short- and long-  
109   term costs animals pay for sleep loss, we need to study sleep in wild individuals, non-invasively, and  
110   for extended periods. Recent advances in biologging technology and analysis methods offer an ideal  
111   solution as they allow recording behaviours accurately, non-invasively, without direct observations  
112   and for long time periods in the wild (Wilson *et al.* 2008; Williams *et al.* 2020). Here, we investigate  
113   how ambient temperature, humidity, rainfall, snow, day length, and moonlight, influence sleep time,  
114   fragmentation and quality over the annual cycle in wild boar (*Sus scrofa*) that experience a broad  
115   range of environmental conditions in the wild. The wild boar is a generalist species that exhibits  
116   considerable behavioural plasticity under varying conditions (Podgórski *et al.* 2013), thus it is a good

117 model for investigating how environmental changes influence sleep. Importantly, laboratory studies  
118 with electroencephalogram (EEG) on sleep in pigs, the domesticated relatives of wild boars (*Allwin et*  
119 *al.* 2016), provide valuable robust information on which to base the classification of sleep with  
120 biologgers.

121       Using Daily Diaries (DDs, Wildbyte Technologies Ltd), multi-sensor biologgers that allow  
122 discrimination of complex behaviour in wild animals (*Wilson et al.* 2008), we estimated total daily  
123 sleep time (TST, hours), the number of sleep bouts per day (sleep fragmentation/consolidation), and  
124 the duration of the longest daily sleep bout (sleep quality) for individual wild boar over the annual  
125 cycle. While total sleep time (TST) over 24hrs is an appropriate ecological estimate of sleep time in  
126 animals (*Capellini et al.* 2008), the number of sleep bouts over which TST occurs reflects sleep  
127 efficiency, since individuals that frequently wake up spend more time in transitional stages and less  
128 time in restorative deep sleep (*Bonnet* 2004, *Capellini et al.* 2009). Finally, the duration of the  
129 longest daily sleep bout in a 24-hour period indicates sleep quality as it represents the best  
130 opportunity for an individual to accrue the benefits of the most restorative stages of deep sleep  
131 (*Bonnet & Arand* 2003). Combined, these three daily measures of sleep provide an ecologically  
132 meaningful assessment of sleep quantity and quality. We thus predict that TST is reduced, the  
133 number of sleep bouts/day is higher, and the duration of the longest daily bout is shorter when  
134 ambient temperature and humidity are higher. Conversely, we expect that greater rainfall and snow  
135 depth increase TST, reduce the number of bouts/day, and increase the duration of the longest bout.  
136 Finally, we predict that longer day lengths increase TST, reduce the number of bouts/day, and  
137 increase the duration of the longest bout, while greater moonlight should increase the number of  
138 bouts, reduce TST and the longest bout. Moreover, unlike previous studies, we also investigate  
139 whether, and to what extent individuals differ in sleep time and patterns, and in how their sleep  
140 changes with environmental conditions.

141

## 142 [Methods](#)

143 Study sites. This study took place between 05/05/19 and 01/12/21 (start-to-end 941 days), in  
144 Kostelec (Central Bohemian region; 49.96N, 14.78E) and Doupov (Karlovy Vary region; 50.24N,  
145 13.12E) in the Czech Republic (Figure S1). Kostelec is forested suburban area near Prague open to  
146 the public; Doupov is mixed forest and hills, closed to the public with military/forestry access only.

147 Procedures. We employed traps to capture, immobilise, and fit 28 adult and sub-adult wild boar (24  
148 females and 4 males) with collars bearing biologging units. We used customized Vertex Plus collars  
149 produced by Vectronic Aerospace GmbH (<https://www.vectronic-aerospace.com/>, Berlin, Germany),  
150 carrying Daily Diaries (DD; Wildbyte Technologies Inc, Swansea, Wales) and a standard GPS module.  
151 DD carried a tri-axial accelerometer recording at 10Hz, data was stored on-board memory cards and  
152 downloaded on collar recovery after drop-off (Wilson *et al.* 2008, Figure S2, Supplementary  
153 Methods). The duration of recording time differed among individuals from 10 to 363 days (mean 89  
154 days), with a population total of 2424 days of data (Figure S3).

155 Ethics. This work was carried out in accordance with the guidelines of the Ministry of the  
156 Environment of the Czech Republic; the trapping and handling protocol was approved by the ethics  
157 committee of the Ministry of the Environment of the Czech Republic and carried out in accordance  
158 with the decision of the ethics committee of the Ministry of the Environment of the Czech Republic  
159 number MZP/2019/630/361. A full description of trapping, immobilization, and handling procedures  
160 is available in the Supplementary Methods.

161 Classification of sleep. We derived a robust procedure to identify sleep bouts with DD data by using  
162 EEG studies of sleep in domestic pigs to precisely describe sleep postures and derive rules to identify  
163 these in the accelerometer data. These studies identify two sleep postures in pigs; lateral or sternal  
164 recumbency with the head on the ground (Ruckebusch 1972; Skinner *et al.* 1975; Kuipers & Watson  
165 1979), accompanied by rapid loss of muscle tone at sleep onset (Ruckebusch 1972). To derive  
166 posture from the raw DD acceleration data (in *g*) we calculated the “static acceleration”, the degree

167 of acceleration due to gravity only (Wilson *et al.* 2008). Then, from a running mean of the static  
168 acceleration (“smoothed”, calculated over two seconds, or 20Hz) we computed the body pitch and  
169 roll angles using the arcsine of the  $g$  for the surge (pitch) and sway (roll) axes (e.g. 0.98 $g$  on the surge  
170 axis equals 0° pitch; Shepard *et al.* (2008). Pitch and roll angles were smoothed over two seconds  
171 and sternal recumbency with head-down was defined as ( $pitch < 0^\circ$ ) and ( $roll > -15^\circ$  and  $+15^\circ <$ ),  
172 while lateral recumbency was defined as ( $roll < -15^\circ$  and  $> +15^\circ$ ). Sustained lack of movement, the  
173 other key behavioural cue for sleep, was identified using VeDBA smoothed over two second. VeDBA  
174 is the sum of the vector of the dynamic acceleration (raw acceleration with the gravitational  
175 component removed), calculated as;

$$176 \quad VeDBA = \sqrt{A_x^2 + A_y^2 + A_z^2}$$

177 where  $A_x$ ,  $A_y$ ,  $A_z$  are the dynamic components of each axis of acceleration (see Williams *et al.*  
178 2020). We set a threshold for movement in sleep postures to 0.2 VeDBA where sleep bouts ended if  
179 this threshold was crossed, allowing small postural changes during sleep. Finally, given that domestic  
180 pigs in sleep posture require 4-5 minutes to transition from wakefulness to sleep (Ruckebusch 1972:  
181 5 minutes 50 seconds; Robert and Dallaire 1986):  $4.11 \pm 3.32$  minutes), we discarded the first 5  
182 minutes as ‘transitional state’ from all periods of data where the criteria for sleep posture and lack  
183 of movement were met. This classification therefore separates sleep from wakeful rest, using the  
184 behavioural markers for sleep (Figure 1, Figures S4 & S5).

185         When considering individual differences collected from movement data, it is necessary to  
186 carefully check that these differences do not arise from measurement error, equipment malfunction,  
187 or data processing (Hertel *et al.* 2020). In order to address this, all boar were fitted with the same  
188 devices and the data were processed in the same manner. We visually inspected processed and raw  
189 accelerometry data to ensure there were no sources of error.



190 Environmental data. We drew hourly weather data from the Jevany (Kostelec, 49.96N, 14.80E) and  
191 Kyelska Spa (Doupov, 50.26N, 13.02E) weather stations ([www.visualcrossing.com](http://www.visualcrossing.com)). Daily means were  
192 computed for ambient temperature (degrees Celsius, °C); snow depth (cm); and relative humidity  
193 (the amount of water vapor present in the air compared to the maximum amount possible for a  
194 given temperature, as a percent, %). Precipitation (mm) was quantified as the total daily  
195 precipitation. Day length (hours) was estimated as hours of light from sunrise to sunset. Moon phase  
196 was coded as a continuous variable ranging from new moon (dark; 0) to full moon (bright, 1). Table  
197 S1 reports the range of environmental conditions recorded over the study period.

198 Statistical analysis. Following Hertel *et al.* (2020), we used double-hierarchical generalised linear  
199 mixed-effects models (DHGLM) to assess how wild boar altered their sleep in relation to changing  
200 environmental conditions. Specifically, we modelled the changes in the mean of the three sleep  
201 measures (TST, number of daily sleep bouts, longest sleep bout) and their variance (“sigma”  
202 component) in a Bayesian framework with the R package ‘brms’ (Bürkner 2017, 2018; R Core Team  
203 2022; RStudio Team 2022), and the Stan open source modelling platform (Stan Development 2022).  
204 Unlike standard linear mixed-effects models, DHGLM models can handle non-heterogenous residual  
205 errors, allowing a more robust assessment of fixed effects (Bridger *et al.* 2015), which is thus suitable  
206 for data of different individuals recorded over time (Figure S2).

207 Prior to analyses, the longest bout/day was log-transformed and all fixed effects were  
208 centred and scaled (Kruschke 2015). We assigned Gaussian distributions to response variables. We  
209 included an autoregression term of order 1, applied to each individual, to control for temporal  
210 autocorrelation. As our data structure was hierarchical, where measures of sleep were nested inside  
211 individual ID, we included ID as a random effect for both the mean and sigma component of each  
212 model, to determine whether inter- and intra-individual variation in the three sleep measures varied  
213 by individual. We controlled for location, sex, and year of data collection by including these as fixed  
214 effects in model.

215 We ran models using Markov chain Monte Carlo (MCMC) with weakly informative, normally  
216 distributed priors for the fixed effects (for TST and number of bouts/day models: mean of zero and a  
217 variance of 10; for longest bout/day model: mean of zero and variance of 100). We assigned weakly  
218 informative, scaled t-distributed priors with 3 degrees of freedom (Gelman *et al.* 2008) to the  
219 random effects (individual-level variation) and error terms in both components of the models. We  
220 ran chains of 15,000 iterations with a burn-in of 1,000 iterations for TST and number of bouts  
221 models, and 30,000 iterations with a burn-in of 20,000 iterations for the longest bout model,  
222 sampling every 15<sup>th</sup> iteration. Visual inspection of the traces in the resulting posterior distributions  
223 showed adequate mixing and convergence. The Gelman-Rubin convergence statistic (Rhat) showed  
224 satisfactory convergence as values were equal to 1 for all parameters (Gelman *et al.* 2013). Effective  
225 sample size (ESS) for all estimated parameters over 1000 confirmed that the posterior distributions  
226 had negligible levels of autocorrelation (Tables S2-4). Models were run in triplicate and converged  
227 on qualitatively similar solutions.

228 Environmental, sex, and location variables were entered simultaneously as predictors in a  
229 starting 'maximal model' and treated as fixed effects. We used a model reduction approach to  
230 identify meaningful predictors (Crawley 2012). Thus, from 'maximal models' with all fixed predictors  
231 we removed the least meaningful predictor, re-ran the model and repeated the procedure until only  
232 meaningful predictors remained in a minimal statistically justifiable model ('reduced models').  
233 Predictors were classed as meaningful if the percentage of their posterior distribution crossing zero  
234 in the opposite direction of the effect was less than 5 (percentage cross-zero:  $P_x$ ; e.g. Capellini *et al.*  
235 (2015). Models also included month of the year to account for seasonal changes not captured by  
236 environmental predictors. Because the effect of "month" is cyclical (e.g. where month 12 is more  
237 similar to month 1 than month 6) we used a nonlinear second-order polynomial term. This was  
238 applied both as a fixed effect and a random slope term in the model formula. We used the Widely  
239 Applicable Information Criterion (WAIC) to confirm that models fitted with the random slope for

240 month provided a better fit to the data than an intercept-only model ( $\Delta\text{WAIC} > 7$  indicates a superior  
241 model fit).

242 From the model random effects, we used the individual-level mean variance of each sleep  
243 measure, and its residual variance to calculate residual intra-individual variation (rIIV), i.e. how  
244 predictable each individual was in sleep. We then calculated the coefficient of variation in  
245 predictability (CVp); a measure of among-individual variation in predictability, standardised and  
246 comparable across studies (Cleasby *et al.* 2015). CVp closer to 0 indicates a population of more  
247 predictable individuals and a CVp closer to 1 indicates a population of less predictable individuals.

## 248 Results

249 Descriptive statistics. Across the study period boars slept on average for 10.6 hours/day (mean TST,  
250 SD  $\pm 3.4$  hours) divided in 21 sleep bouts (mean, SD  $\pm 40$  bouts) averaging 31.4 minutes (mean, SD  
251  $\pm 40.8$  minutes); mean longest sleep bout was 2.5 hours (SD  $\pm 1.38$ ). All sleep parameters showed  
252 qualitative inter-individual variation, e.g. the shortest-sleeping individual slept for 6.4 hours per day  
253 on average; longest-sleeper slept for 14.8 hours. Most sleep occurred during the early morning and  
254 middle of the day (Figure S6), with the longest sleep bout usually beginning at 0400 or around 1200.

255 Total Sleep Time (TST, hours). From a maximal model with all predictors, the reduced model showed  
256 that TST was shorter with higher temperature (median [95% CI]: -0.55 [-0.76, -0.36]) and humidity (-  
257 0.12 [-0.24, -0.01]), longer day length (-0.22 [-0.41, -0.04]), and fuller moon phase (-0.14 [-0.24, -  
258 0.04], Figure 2, Table S2). Furthermore, individuals at Kostolec slept more daily than those at Doupov  
259 (1.96 [0.27, 3.43]), and boars slept less in 2020 and 2021 than 2019 (2020: -3.34 [-4.88, -1.90], 2021:  
260 -4.70 [-5.94, -3.42]; Figure 2, Table S2). The random effects of the model showed that individual boar  
261 differed in their mean TST (1.23 [0.85, 1.86]) where model-derived estimates varied from 12.90 to  
262 16.66 hours across individuals (Table S2, Figure 3A). Individual boar also differed in their variance  
263 (rIIV, 0.24 [0.17, 0.33]), where model-derived estimates varied from 1.23 to 2.72 hours across

264 individuals (Table S2, Figure 3B) with a CVp of 0.24 [0.17, 0.33]. The individual-level model estimates  
265 showed no correlation between mean TST and variance in TST (0.11 [-0.32, 0.52], Table S2).

266 Number of sleep bouts/day. From a maximal model with all predictors, the reduce model found that  
267 the number of sleep bouts/day increased with temperature (1.31 [0.59, 2.05]), and declined with  
268 greater humidity (-0.78 [-1.14, -0.40]) and snow depth (-0.44 [-0.84, -0.03]) (Figure 2, Table S3). In  
269 addition, boar slept in more bouts/day in 2021 than 2020 (2020: 2.72 [-2.58, 7.58]; 2021: 6.14 [1.72,  
270 10.44]; Figure 2, Table S3) or 2019 (reference level). The random effects of the model revealed that  
271 individual boar differed in the mean number of sleep bouts/day (4.78 [2.97, 7.35]) where model  
272 estimates varied from 11.46 to 28.85 bouts across individuals (Table S3, Figure 4A). Individual boar  
273 also differed in their variance (rIIV, 0.19 [0.14, 0.26], Table S3, Figure 4B), where model estimates  
274 varied from 3.89 to 9.60 bouts/day across individuals (Figure 4B), with a CVp of 0.20 [0.14, 0.26]. The  
275 individual-level model estimates showed a positive correlation between mean number of sleep  
276 bouts/day and variance in the number of sleep bouts/day (0.54 [0.06, 0.84], Table S3), indicating  
277 that boar that slept in more bouts exhibited a higher variance in the number of bouts.

278 Longest sleep bout. From a maximal model with all predictors, the reduced model showed that the  
279 duration of the longest bout/day decreased with increasing temperature (-0.08 [-0.11, -0.04]), and  
280 increased with greater precipitation (0.02 [0.00, 0.04]) and snow depth (0.03 [0.01, 0.04], Figure 2,  
281 Table S4). The longest sleep bout was shorter in both 2020 and 2021 compared to 2019 (2020: -0.24  
282 [-0.37, -0.10]; 2021: -0.71 [-0.80, -0.61]; Figure 2, Table S4). The random effects of the model  
283 revealed that individual boar did not differ in the estimated mean duration of the longest sleep bout  
284 (0.04 [0.00, 0.11]) (Table S4, Figure 5A). Individual boar however differed in their variance (rIIV, 0.18  
285 [0.13, 0.25]), where model estimates varied from 1.39 to 1.75 hours per day across individuals (Table  
286 S4, Figure 5B), with a CVp of 0.18 [0.12, 0.25]. The model estimates at the individual level showed no  
287 correlation between mean duration of the longest bout and variance in the longest bout (-0.44 [-

288 0.91, 0.53], Table S4), indicating that boar with greater duration for the longest sleep bout did not  
289 exhibit higher variance in its duration.

## 290 Discussion

291 Sleep is vital, yet its patterns and tradeoffs under changing ecological conditions are largely  
292 unknown for wild animals. Investigating sleep outside the laboratory for extended periods of time is  
293 thus essential, if we are to understand its ecology and evolution. EEG studies of sleep indicate that  
294 environmental conditions related to thermoregulation and light affect sleep quantity, fragmentation  
295 and quality in the laboratory; however, their role in wild animals is poorly understood (LeGates *et al.*  
296 2014; Harding *et al.* 2019). Using cutting-edge biologging technology we measured sleep quantity  
297 (daily total sleep time, TST), fragmentation/consolidation (number of sleep bouts/day) and quality  
298 (duration of the longest bout), in wild boar in their natural environment. Our study demonstrates  
299 that sleep quantity, fragmentation and quality varied with changes in environmental conditions and  
300 reveals that individuals differ substantially in their total daily sleep and fragmentation.

301 Laboratory studies have shown that environmental conditions are an important mediator of  
302 sleep behaviour (Kräuchi & Deboer 2011). The few, short-term field studies on sleep mostly confirm  
303 that temperature and light influence sleep quantity because of their effect on thermoregulation and  
304 as cue for circadian rhythms (e.g Davimes *et al.* 2018). Our study reveals that, over the annual cycle,  
305 TST in wild boar is reduced not only in warmer days but also in longer days and in more humid  
306 conditions. Hot and humid days, combined with wild boar's preference to sleep during day time,  
307 present a major challenge for thermoregulation in this species since wild boar lack sweat glands and  
308 need to optimise body temperature by seeking out wallows (Singer *et al.* 1981). Because wallows are  
309 often located in irrigation ditches and similar areas near to human habitation, the perceived  
310 predation risk or disturbance by people is likely high and may have further detrimental impacts on  
311 sleep quantity in this species (Stuber *et al.* 2014). We further found that a more advanced moon  
312 phase reduces sleep to the same magnitude as humidity, indicating that, unexpectedly, moonlight  
313 does not favour but rather reduce sleep time in this nocturnally active species. Human disturbance is

314 instead the probable cause of the shorter TST in 2020 and 2021, years during which human use of  
315 forests increased as a result of COVID-pandemic (A. Olejarz, personal communication Nov. 2022).  
316 Altogether, our analysis suggests that the influence of environmental conditions on TST may be  
317 exacerbated or mitigated by species traits (activity time, thermoregulatory ability) and their  
318 interaction with external natural or anthropogenic disturbance.

319         Although an often-overlooked aspect of sleep behaviour, sleep fragmentation (sleep that is  
320 distributed over an increasing number of bouts) is, like sleep deprivation, associated with negative  
321 effects on physiology and cognition (Stepanski 2002; Bonnet & Arand 2003; Mezick *et al.* 2009).  
322 Environmental conditions that reduce TST also increase sleep fragmentation in the laboratory  
323 (Harding *et al.* 2020). Consistently, we find that higher temperature is associated with more sleep  
324 bouts/day, hence greater fragmentation, in wild boar. Thus, a reduction in TST in warmer conditions  
325 with a concurrent increase in sleep bouts likely leads to more severe effects on health.  
326 Unexpectedly, however, sleep is less fragmented with greater humidity although this effect is small.  
327 In support of the hypothesis that snow and rainfall promote sleep quality and quantity by favouring  
328 thermoregulation through evaporative cooling or increasing the thermal value of bedding sites  
329 (Harding *et al.* 2019), sleep in wild boar is less fragmented with higher snow depth and more  
330 precipitation. Overall, we conclude that, like TST, sleep fragmentation in wild boar respond  
331 plastically to changing environmental conditions over the annual cycle. Finally, given that the  
332 number of sleep bouts was higher in 2020, we suggest that human disturbance may not only reduce  
333 time for sleep but also increase its fragmentation and ultimately have serious detrimental effects on  
334 health in wild animals.

335         Lastly, we investigated how the duration of the longest sleep bout responded to changing  
336 environmental conditions. Although not generally considered in sleep studies, the duration of the  
337 longest bout/day is a good indicator of sleep quality because it offers the best opportunity to gain  
338 the key benefits of the deepest and most restorative sleep stages (Bonnet 2004). As predicted,

339 warmer temperature reduces the duration of the longest bout while greater precipitation and snow  
340 depth increase it. Similar to TST, the longest sleep bout was shorter in 2020 and 2021. Overall, sleep  
341 quality (longest bout) and quantity thus respond similarly to environmental conditions. Bringing  
342 results of the three sleep parameters together, we conclude that environmental conditions that are  
343 known to influence thermoregulation in the laboratory affect sleep in wild animals. Specifically,  
344 sleep is shorter, more fragmented and of lower quality in warmer temperature; precipitation and  
345 snow favour sleep consolidation into fewer bouts and sleep quality, while greater humidity reduces  
346 TST but this negative effect is compensated by a greater sleep consolidation. Given the complex way  
347 in which sleep behaviour responds plastically to changing environmental conditions, future studies  
348 on sleep in wild animals should thus consider more than TST for a more comprehensive  
349 understanding of how the benefits of sleep are achieved (or compromised) under natural conditions.

350           Our analytic approach allows us to decompose inter- and intra-individual variation  
351 (individual mean and predictability, Hertel *et al.* 2020) in sleep and reveal that individuals are distinct  
352 in daily TST and fragmentation, but are similar in the duration of the longest sleep bout. Individuals  
353 also differ in the plasticity of TST and fragmentation but not of the longest bout. Thus, all individuals  
354 appear able to satisfy a physiological minimum requirement for sleep, as quantified by the longest  
355 sleep bout. We propose that the longest sleep bout could be a better species-specific indicator of  
356 sleep need compared to the commonly estimated TST, as we find that the latter varies in both mean  
357 and variance across individuals. In support of this suggestion, we note that the variable EEG  
358 estimates of TST in domestic pigs fall somewhat in the middle of the distribution of sleep times for  
359 wild boar in this study (Ruckebusch 1972: 7.82 hours; Robert and Dallaire 1986 9.15 hours), even  
360 when considering days with similar environmental conditions to those in the laboratory (under such  
361 conditions wild boar sleep ranges from 5.0 hours to 14.7 hours, mean 10.6 hours). Consequently,  
362 differences in laboratory estimates of TST, typically based on few individuals and short recording  
363 periods, likely reflect sampling effects. Altogether, our results call into question the conclusions of  
364 some earlier studies that animals in the laboratory sleep more (or less) than in the wild.

365           Given the established benefits of sleep for the body and brain (Xie 2013; Opp & Krueger  
366 2015), we propose that sleep can be viewed as a behaviour favouring self-maintenance and survival  
367 and its variation among individuals that we documented may be explained by the extended pace-of-  
368 life syndrome theory (extended POLS; Dammhahn *et al.* 2018. According to POLS, individual  
369 differences in behavioural and physiological traits covary with life history traits. Specifically, “fast-  
370 living” individuals are expected to grow quickly, invest more in reproduction and less in self-  
371 maintenance, and ultimately die younger. At the opposite extreme, “slow-living” individuals should  
372 grow slowly, invest more resources in self-maintenance than reproduction, and live longer. Thus,  
373 shorter sleep may represent a facet of the “fast” living strategy where sleep, as a self-maintenance  
374 process, is reduced in favour of behaviours that enhance reproductive investment. Consistent with  
375 this suggestion, individual-level differences in TST in fruit flies (*Drosophila melanogaster*) are  
376 genetically determined and shorter-sleeping flies die younger (Cirelli *et al.* 2005; Anderson *et al.*  
377 2022). Given that sleep loss comes at substantial costs (Rechtschaffen *et al.* 1989; Bonnet & Arand  
378 2003; Kushida 2004; Guyon *et al.* 2014), we thus expect that individuals with shorter and more  
379 fragmented TST exhibit reduced immunocompetency and impaired cognitive abilities such as  
380 decision making (e.g. response time to approaching predators). Future research should investigate  
381 whether short-sleeping individuals within-species show correlated tendencies with traits such as  
382 growth rate and reproductive behaviour.

383           To conclude, our study demonstrates that, over the annual cycle, sleep in the wild is shaped  
384 by changing environmental conditions that affect thermoregulation. Importantly, sleep is shorter,  
385 more fragmented and of lower quality in warmer temperatures. Our study also reveals profound  
386 individual level differences in daily sleep quantity and efficiency, and in plasticity. Given the major  
387 role that sleep plays in health (Klingenberg *et al.* 2012; Chaput *et al.* 2017; Besedovsky *et al.* 2019),  
388 global warming and the associated increase in extreme climatic events, are likely to negatively  
389 impact sleep, and consequently health, in wildlife, particularly in nocturnal animals. Such



390 detrimental effects may be further exacerbated if wild animals are exposed to anthropogenic  
391 stressors that disrupts sleep.

### 392 [Acknowledgements](#)

393 EM is funded by the Department for the Economy (DfE), Northern Ireland. This work was supported  
394 by EVA4.0, no. CZ.02.1.01/0.0/0.0/16\_019/0000803 financed by OP RDE, supported by grant of  
395 Ministry of agriculture of Czech Republic no. QK1910462 to MJ.

396

397 **References**

- 398 1.
- 399 Anafi, R.C., Kayser, M.S. & Raizen, D.M. (2019). Exploring phylogeny to find the function of sleep.  
400 *Nature Reviews Neuroscience*, 20, 109-116.
- 401 2.
- 402 Anderson, L., Camus, M.F., Monteith, K.M., Salminen, T.S. & Vale, P.F. (2022). Variation in  
403 mitochondrial DNA affects locomotor activity and sleep in *Drosophila melanogaster*.  
404 *Heredity*, 129, 225-232.
- 405 3.
- 406 Besedovsky, L., Lange, T. & Haack, M. (2019). The Sleep-Immune Crosstalk in Health and Disease.  
407 *Physiol Rev*, 99, 1325-1380.
- 408 4.
- 409 Bonnet, M.H. (2004). Sleep Fragmentation. In: *Sleep Deprivation: Basic Science, Physiology, and*  
410 *Behaviour* (ed. Kushida, CA). CRC Press, pp. 103-117.
- 411 5.
- 412 Bonnet, M.H. & Arand, D.L. (2003). Clinical effects of sleep fragmentation versus sleep deprivation.  
413 *Sleep Medicine Reviews*, 7, 297-310.
- 414 6.
- 415 Bridger, D., Bonner, S.J. & Briffa, M. (2015). Individual quality and personality: bolder males are less  
416 fecund in the hermit crab *Pagurus bernhardus*. *Proceedings of the Royal Society B: Biological*  
417 *Sciences*, 282.
- 418 7.
- 419 Bürkner, P.-C. (2017). brms: An R Package for Bayesian Multilevel Models Using Stan. *Journal of*  
420 *Statistical Software*, 80, 1-28.
- 421 8.
- 422 Bürkner, P.-C. (2018). Advanced Bayesian Multilevel Modeling with the R Package brms. *The R*  
423 *Journal*, 10, 395-411.
- 424 9.
- 425 Capellini, I., Baker, J., Allen, W.L., Street, S.E. & Venditti, C. (2015). The role of life history traits in  
426 mammalian invasion success. *Ecology Letters*, 18, 1099-1107.
- 427 10.
- 428 Capellini, I., Preston, B.T., Mcnamara, P., Barton, R.A. & Nunn, C.L. (2009). Ecological constraints on  
429 mammalian sleep architecture. In: *Evolution of Sleep*. Cambridge University Press, pp. 12-  
430 33.
- 431 11.
- 432 Chaput, J.-P., Gray, C.E., Poitras, V.J., Carson, V., Gruber, R., Birken, C.S. *et al.* (2017). Systematic  
433 review of the relationships between sleep duration and health indicators in the early years  
434 (0–4 years). *BMC Public Health*, 17, 855.
- 435 12.
- 436 Cirelli, C., Bushey, D., Hill, S., Huber, R., Kreber, R., Ganetzky, B. *et al.* (2005). Reduced sleep in  
437 *Drosophila Shaker* mutants. *Nature*, 434, 1087-1092.
- 438 13.
- 439 Cirelli, C. & Tononi, G. (2008). Is sleep essential? *PLoS Biol*, 6, e216.

- 440 14.
- 441 Cleasby, I.R., Nakagawa, S. & Schielzeth, H. (2015). Quantifying the predictability of behaviour:  
442 statistical approaches for the study of between-individual variation in the within-individual  
443 variance. *Methods in Ecology and Evolution*, 6, 27-37.
- 444 15.
- 445 Crawley, M.J. (2012). The R book. John Wiley & Sons, pp. 388-449.
- 446 16.
- 447 Dammhahn, M., Dingemanse, N.J., Niemelä, P.T. & Réale, D. (2018). Pace-of-life syndromes: a  
448 framework for the adaptive integration of behaviour, physiology and life history. *Behavioral*  
449 *Ecology and Sociobiology*, 72, 1-8.
- 450 17.
- 451 Davimes, J.G., Alagaili, A.N., Bhagwandin, A., Bertelsen, M.F., Mohammed, O.B., Bennett, N.C. *et al.*  
452 (2018). Seasonal variations in sleep of free-ranging Arabian oryx (*Oryx leucoryx*) under  
453 natural hyperarid conditions. *Sleep*, 41.
- 454 18.
- 455 Downs, C.T., Awuah, A., Jordaan, M., Magagula, L., Mkhize, T., Paine, C. *et al.* (2015). Too hot to  
456 sleep? Sleep behaviour and surface body temperature of Wahlberg's Epauletted Fruit Bat.  
457 *PLoS One*, 10, e0119419.
- 458 19.
- 459 Dzierzewski, J.M., Dautovich, N. & Ravyts, S. (2018). Sleep and Cognition in Older Adults. *Sleep*  
460 *Medicine Clinics*, 13, 93-106.
- 461 20.
- 462 Friborg, O., Bjorvatn, B., Amponsah, B. & Pallesen, S. (2012). Associations between seasonal  
463 variations in day length (photoperiod), sleep timing, sleep quality and mood: a comparison  
464 between Ghana (5°) and Norway (69°). *Journal of Sleep Research*, 21, 176-184.
- 465 21.
- 466 Gelman, A., Carlin, J., Stern, H. & Rubin, D. (2013). Bayesian Data Analysis, Chapman & Hall/CRC  
467 Texts in Statistical Science Vol. 3.
- 468 22.
- 469 Gelman, A., Jakulin, A., Pittau, M.G. & Su, Y.-S. (2008). A weakly informative default prior distribution  
470 for logistic and other regression models. *The Annals of Applied Statistics*, 2, 1360-1383,  
471 1324.
- 472 23.
- 473 Guyon, A., Balbo, M., Morselli, L.L., Tasali, E., Leproult, R., L'Hermite-Balériaux, M. *et al.* (2014).  
474 Adverse Effects of Two Nights of Sleep Restriction on the Hypothalamic-Pituitary-Adrenal  
475 Axis in Healthy Men. *The Journal of Clinical Endocrinology & Metabolism*, 99, 2861-2868.
- 476 24.
- 477 Harding, E.C., Franks, N.P. & Wisden, W. (2019). The Temperature Dependence of Sleep. *Frontiers in*  
478 *Neuroscience*, 13.
- 479 25.
- 480 Harding, E.C., Franks, N.P. & Wisden, W. (2020). Sleep and thermoregulation. *Current Opinion in*  
481 *Physiology*, 15, 7-13.
- 482 26.

- 483 Hertel, A.G., Niemelä, P.T., Dingemanse, N.J. & Mueller, T. (2020). A guide for studying among-  
484 individual behavioral variation from movement data in the wild. *Movement Ecology*, 8, 30.  
485 27.
- 486 Klingenberg, L., Sjödin, A., Holmbäck, U., Astrup, A. & Chaput, J.P. (2012). Short sleep duration and  
487 its association with energy metabolism. *Obesity Reviews*, 13, 565-577.  
488 28.
- 489 Klinzing, J.G., Niethard, N. & Born, J. (2019). Mechanisms of systems memory consolidation during  
490 sleep. *Nature Neuroscience*, 22, 1598-1610.  
491 29.
- 492 Kräuchi, K. & Deboer, T. (2011). Body temperatures, sleep, and hibernation. *Principles and practice  
493 of sleep medicine*, 323-334.  
494 30.
- 495 Kuipers, M. & Watson, T.S. (1979). Sleep in piglets: An observational study. *Applied Animal  
496 Ethology*, 5, 145-151.  
497 31.
- 498 Kushida, C.A. (2004). Sleep Deprivation: Basic Science, Physiology, and Behaviour. In: *Lung Biology in  
499 Health and Disease* (ed. Lenfant, C). CRC Press.  
500 32.
- 501 Lan, L., Tsuzuki, K., Liu, Y.F. & Lian, Z.W. (2017). Thermal environment and sleep quality: A review.  
502 *Energy and Buildings*, 149, 101-113.  
503 33.
- 504 LeGates, T.A., Fernandez, D.C. & Hattar, S. (2014). Light as a central modulator of circadian rhythms,  
505 sleep and affect. *Nature Reviews Neuroscience*, 15, 443-454.  
506 34.
- 507 Leproult, R. & Van Cauter, E. (2010). Role of sleep and sleep loss in hormonal release and  
508 metabolism. *Endocr Dev*, 17, 11-21.  
509 35.
- 510 Lim, J. & Dinges, D.F. (2010). A meta-analysis of the impact of short-term sleep deprivation on  
511 cognitive variables. *Psychological Bulletin*, 136, 375-389.  
512 36.
- 513 Loftus, J.C., Harel, R., Núñez, C.L. & Crofoot, M.C. (2022). Ecological and social pressures interfere  
514 with homeostatic sleep regulation in the wild. *eLife*, 11, e73695.  
515 37.
- 516 Manzar, M.D., Zannat, W. & Hussain, M.E. (2014). Sleep and physiological systems: a functional  
517 perspective. *Biological Rhythm Research*, 46, 195-206.  
518 38.
- 519 Medic, G., Wille, M. & Hemels, M.E. (2017). Short- and long-term health consequences of sleep  
520 disruption. *Nat Sci Sleep*, 9, 151-161.  
521 39.
- 522 Mezick, E.J., Matthews, K.A., Hall, M., Kamarck, T.W., Buysse, D.J., Owens, J.F. *et al.* (2009). Intra-  
523 individual variability in sleep duration and fragmentation: associations with stress.  
524 *Psychoneuroendocrinology*, 34, 1346-1354.  
525 40.

- 526 Morris, C.J., Aeschbach, D. & Scheer, F.A. (2012). Circadian system, sleep and endocrinology. *Mol Cell*  
527 *Endocrinol*, 349, 91-104.  
528 41.
- 529 Mota-Rojas, D., Napolitano, F., Braghieri, A., Guerrero-Legarreta, I., Bertoni, A., Martínez-Burnes, J.  
530 *et al.* (2020). Thermal biology in river buffalo in the humid tropics: Neurophysiological and  
531 behavioral responses assessed by infrared thermography. *Journal of Animal Behaviour and*  
532 *Biometeorology*, 9, 2103.  
533 42.
- 534 Opp, M.R. & Krueger, J.M. (2015). Sleep and immunity: A growing field with clinical impact. *Brain*  
535 *Behav Immun*, 47, 1-3.  
536 43.
- 537 R Core Team (2022). R: A language and environment for statistical computing. R Foundation for  
538 Statistical Computing Vienna, Austria.  
539 44.
- 540 Rechtschaffen, A., Bergmann, B.M., Everson, C.A., Kushida, C.A. & Gilliland, M.A. (1989). Sleep  
541 Deprivation in the Rat: X. Integration and Discussion of the Findings. *Sleep*, 12, 68-87.  
542 45.
- 543 Reinhardt, K.D. (2020). Wild primate sleep: understanding sleep in an ecological context. *Current*  
544 *Opinion in Physiology*, 15, 238-244.  
545 46.
- 546 Reinhardt, K.D., Vyazovskiy, V.V., Hernandez-Aguilar, R.A., Imron, M.A. & Nekaris, K.A. (2019).  
547 Environment shapes sleep patterns in a wild nocturnal primate. *Sci Rep*, 9, 9939.  
548 47.
- 549 Reyes, K.R., Patel, U.A., Nunn, C.L. & Samson, D.R. (2021). Gibbon sleep quantified: the influence of  
550 lunar phase and meteorological variables on activity in *Hylobates moloch* and *Hylobates*  
551 *pileatus*. *Primates*, 62, 749-759.  
552 48.
- 553 Robert, S. & Dallaire, A. (1986). Polygraphic analysis of the sleep-wake states and the REM sleep  
554 periodicity in domesticated pigs (*Sus scrofa*). *Physiology & Behavior*, 37, 289-293.  
555 49.
- 556 RStudio Team (2022). RStudio: Integrated Development for R. Boston, MA.  
557 50.
- 558 Ruckebusch, Y. (1972). The relevance of drowsiness in the circadian cycle of farm animals. *Animal*  
559 *Behaviour*, 20, 637-643.  
560 51.
- 561 Samson, D.R., Crittenden, A.N., Mabulla, I.A., Mabulla, A.Z.P. & Nunn, C.L. (2018). Does the moon  
562 influence sleep in small-scale societies? *Sleep Health*, 4, 509-514.  
563 52.
- 564 Shepard, E., Wilson, R., Quintana, F., Gómez Laich, A., Liebsch, N., Albareda, D. *et al.* (2008).  
565 Identification of animal movement patterns using tri-axial accelerometry. *Endangered*  
566 *Species Research*, 10, 47-60.  
567 53.
- 568 Singer, F.J., Otto, D.K., Tipton, A.R. & Hable, C.P. (1981). Home Ranges, Movements, and Habitat Use  
569 of European Wild Boar in Tennessee. *The Journal of Wildlife Management*, 45, 343-353.

- 570 54.
- 571 Skinner, J.E., Mohr, D.N. & Kellaway, P. (1975). Sleep-stage regulation of ventricular arrhythmias in  
572 the unanesthetized pig. *Circulation Research*, 37, 342-349.
- 573 55.
- 574 Spiegel, K. & Leproult, R. (1999). Impact of sleep debt on metabolic and endocrine function. *The*  
575 *Lancet*, 354, 1435-1439.
- 576 56.
- 577 Stan Development, T. (2022). Stan Modeling Language Users Guide and Reference Manual.
- 578 57.
- 579 Stepanski, E.J. (2002). The effect of sleep fragmentation on daytime function. *Sleep*, 25, 268-276.
- 580 58.
- 581 Stuber, E.F., Grobis, M.M., Abbey-Lee, R., Kempnaers, B., Mueller, J.C. & Dingemanse, N.J. (2014).  
582 Perceived predation risk affects sleep behaviour in free-living great tits, *Parus major*. *Animal*  
583 *Behaviour*, 98, 157-165.
- 584 59.
- 585 Tobler, I. (2011). Phylogeny of sleep regulation. In: *Principles and practice of sleep medicine*. Elsevier,  
586 pp. 112-125.
- 587 60.
- 588 Troynikov, O., Watson, C.G. & Nawaz, N. (2018). Sleep environments and sleep physiology: A review.  
589 *Journal of Thermal Biology*, 78, 192-203.
- 590 61.
- 591 Videan, E.N. (2006). Sleep in captive chimpanzee (*Pan troglodytes*): the effects of individual and  
592 environmental factors on sleep duration and quality. *Behav Brain Res*, 169, 187-192.
- 593 62.
- 594 Wada, K., Tokida, E. & Ogawa, H. (2007). The influence of snowfall, temperature and social  
595 relationships on sleeping clusters of Japanese monkeys during winter in Shiga Heights.  
596 *Primates*, 48, 130-139.
- 597 63.
- 598 Walker, M.P. (2009). The role of sleep in cognition and emotion. *Ann N Y Acad Sci*, 1156, 168-197.
- 599 64.
- 600 Williams, H.J., Taylor, L.A., Benhamou, S., Bijleveld, A.I., Clay, T.A., Grissac, S. *et al.* (2020). Optimizing  
601 the use of biologgers for movement ecology research. *Journal of Animal Ecology*, 89, 186-  
602 206.
- 603 65.
- 604 Wilson, R.P., Shepard, E.L.C. & Liebsch, N. (2008). Prying into the intimate details of animal lives: use  
605 of a daily diary on animals. *Endangered Species Research*, 4, 123-137.
- 606 66.
- 607 Xie, L., Kang, H., Xu, Q., Chen, M.J., Liao, Y., Thiyagarajan, M., O'Donnell, J., Christensen, D.J.,  
608 Nicholson, C., Iliff, J.J., Takano, T., Deane, R., Nedergaard, M. (2013). Sleep Drives Metabolite  
609 Clearance from the Adult Brain. *Science*, 342, 373-377.
- 610 67.

611 Yadav, A., Kumar, R., Tiwari, J., Vaish, V., Malik, S. & Rani, S. (2022). Effect of artificial light at night  
612 on sleep and metabolism in weaver birds. *Environmental Science and Pollution Research*,  
613 80422–80435.

614 68.

615 Yetish, G., Kaplan, H., Gurven, M., Wood, B., Pontzer, H., Manger, P.R. *et al.* (2015). Natural sleep  
616 and its seasonal variations in three pre-industrial societies. *Curr Biol*, 25, 2862-2868.

617

618

619 Figures

620

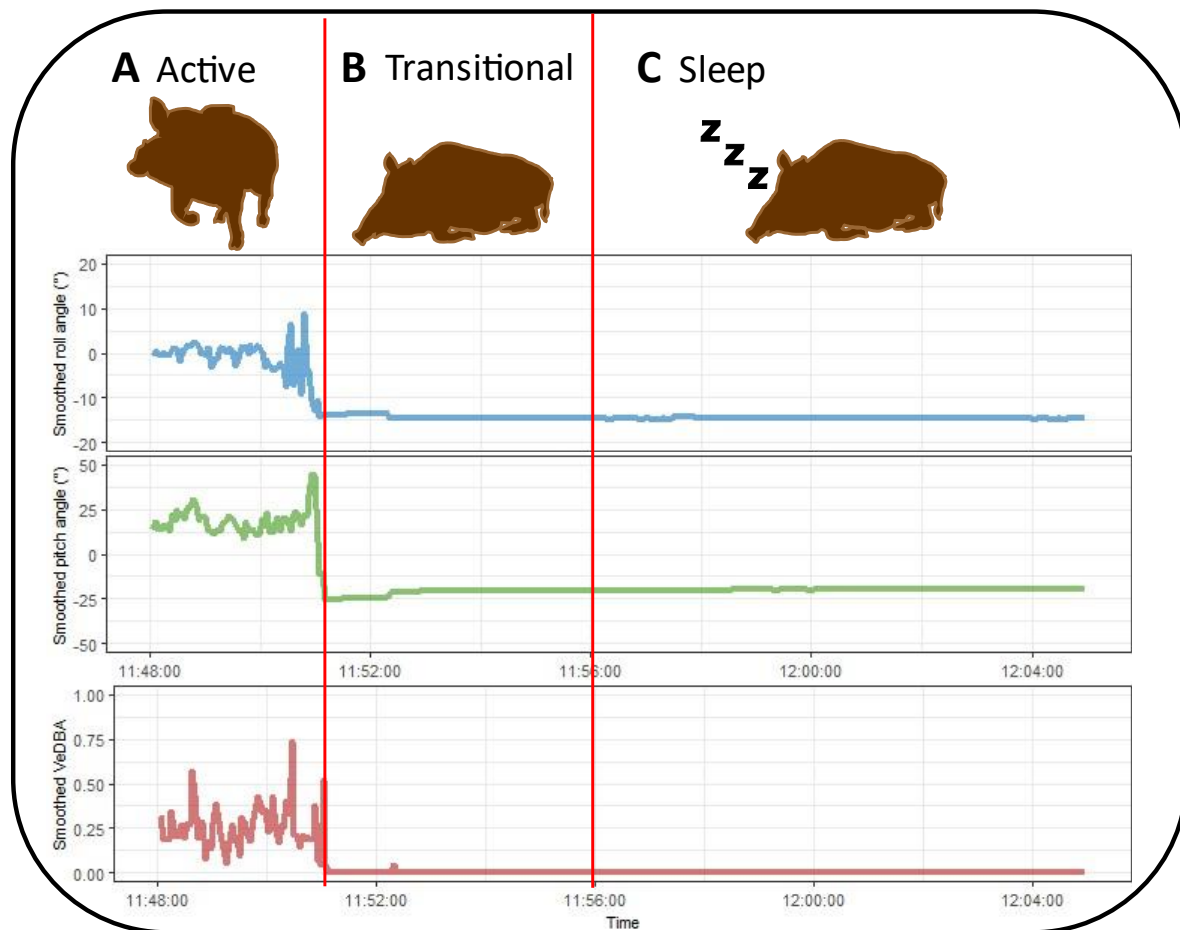

621

622 **Figure 1:** Visualisation of DD data showing changes in smoothed roll, pitch, and VeDBA values,  
623 corresponding to relevant behavioural types (separated by red lines), to identify the onset of sleep.

624 (A), patterns typical of general active behaviours such as movement and foraging; (B) patterns  
625 typical of sternal recumbency for the period of drowsiness/transitional sleep; and (C), an individual is  
626 classified as asleep in sternal recumbency for longer than the 5-minute window with little to no  
627 movement.

628



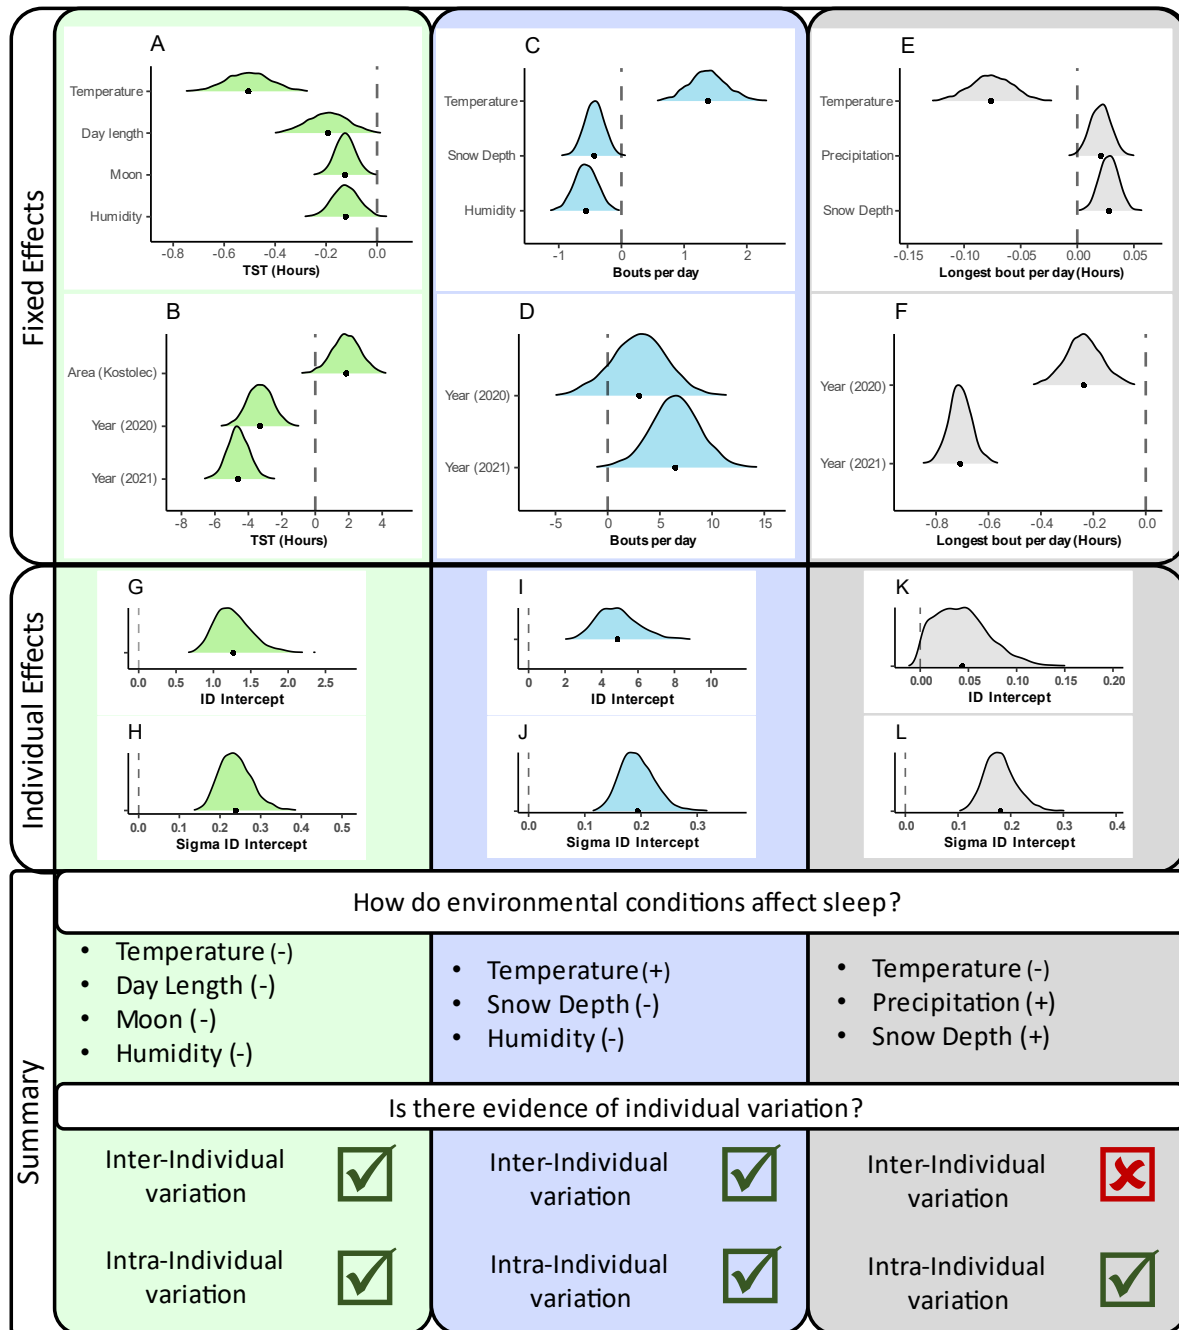

629

630 **Figure 2:** Reduced model results for total sleep time (TST, green), number of bouts/day (blue), and  
 631 duration of the longest sleep bout/day (grey). (A-F); the posterior distributions for the fixed effects  
 632 of environment, year, and location variables, with dashed line denoting 0. (G, I, K); posterior  
 633 distributions of the random effect intercept for the mean (inter-individual variance), and (H, J, L) the  
 634 posterior distribution of the random effect intercept for the sigma (intra-individual variance)  
 635 component for individual ID (individual effects). Direction of effect for environmental variables

636 (denoted with +/-), and evidence of individual variation from the individual effects, are summarised  
637 in the Summary panel (Summary).

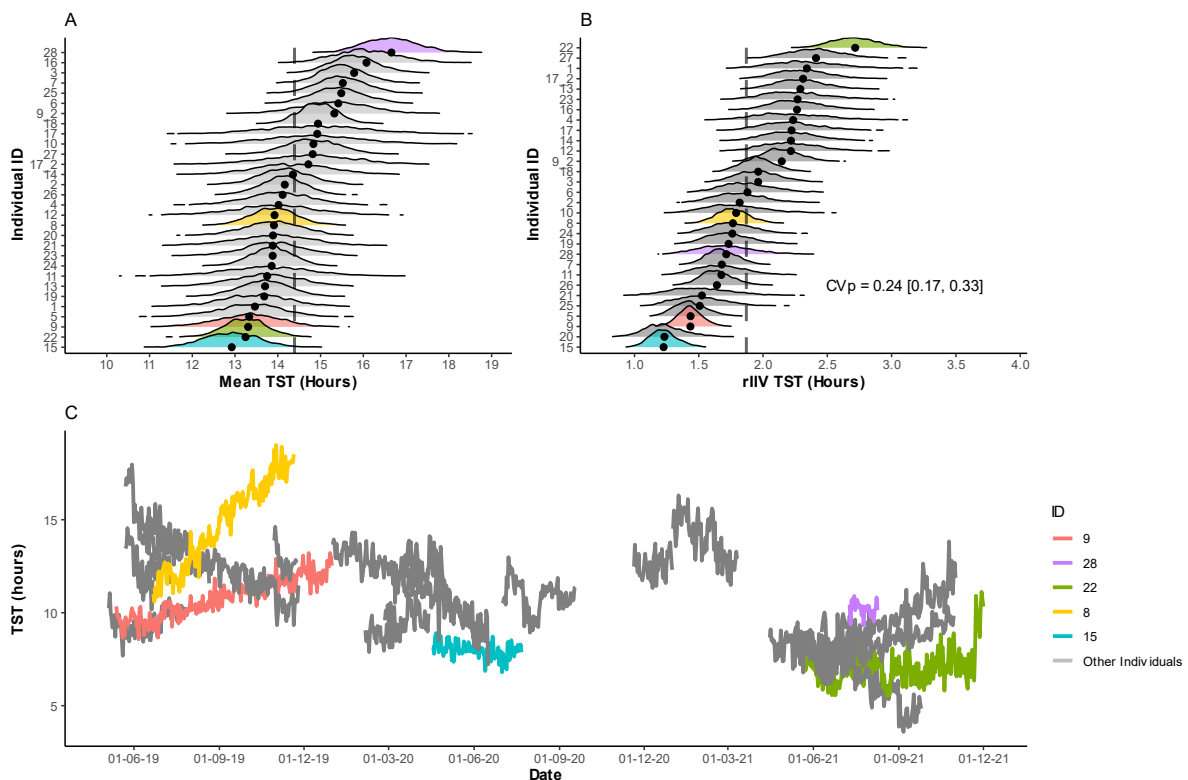

638

639 **Figure 3:** Random effects for individual ID from the reduced model of TST. A; posterior densities of  
640 mean TST estimates by individual, where points denote the individual mean, and dashed line  
641 denotes population median. Selected individuals coloured to illustrate more extreme and average  
642 individuals; the colouration is maintained through figures 3-5. B; posterior densities of TST residual  
643 intra-individual variation (rIIV), where points denote the individual mean, dashed line denotes  
644 population median, and grey shading denotes population 95% credible interval. C; model estimated  
645 values for TST for all individuals across the recording period to visualise temporal variation at the  
646 individual level and discrimination of inter- and intra-individual variation.

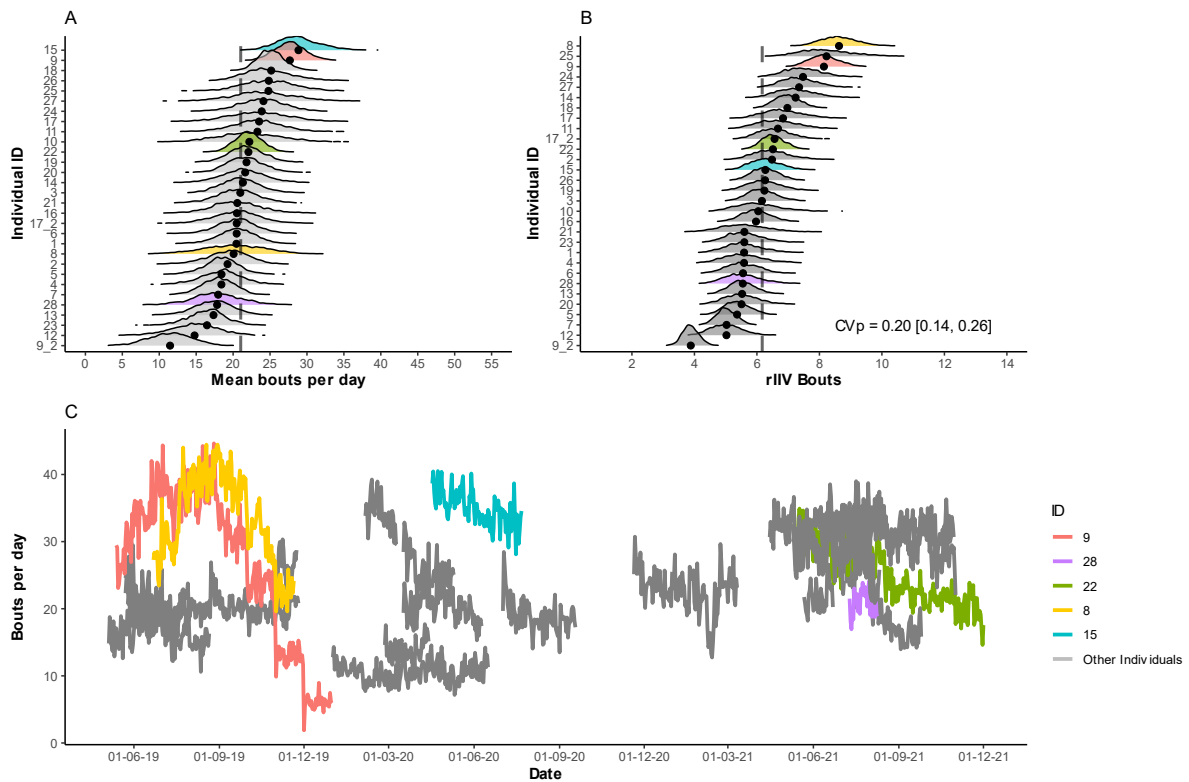

647

648 **Figure 4:** Random effects for individual ID from the reduced model of bouts/day. A; posterior

649 densities of mean bouts/day estimates by individual, where points denote the individual mean, and

650 dashed line denotes population median. B; posterior densities of bouts/day residual intra-individual

651 variation (rIIV), where points denote the individual mean, dashed line denotes population median,

652 and grey shading denotes population 95% credible interval. C; model estimated values for bouts/day

653 for all individuals across the recording period to visualise temporal variation at the individual level

654 and discrimination of inter- and intra-individual variation.

655

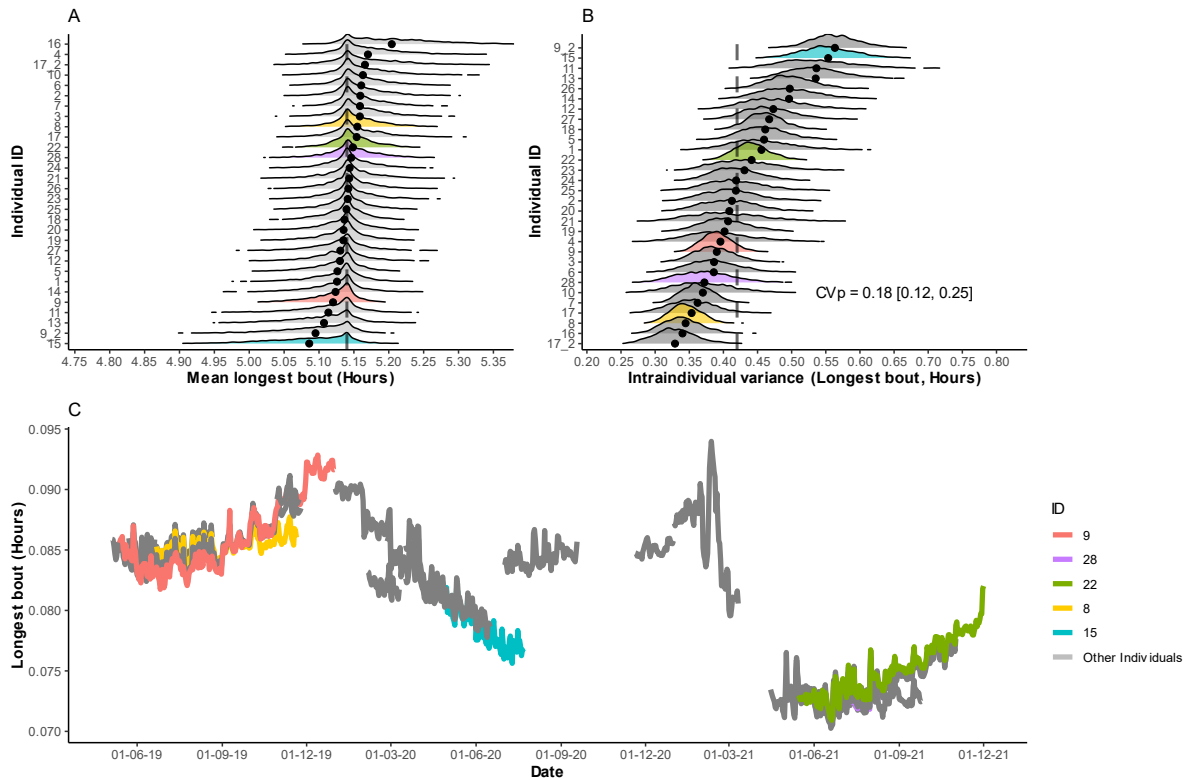

656

657 **Figure 5:** Random effects for individual ID from the reduced model of longest bout/day. A; posterior

658 densities of mean longest bout/day estimates by individual, where points denote the individual

659 mean, and dashed line denotes population median. B; posterior densities of longest bout/day

660 residual intra-individual variation (rIIV), where points denote the individual mean, dashed line

661 denotes population median, and grey shading denotes population 95% credible interval. C; model

662 estimated values for longest bout/day for all individuals across the recording period to visualise

663 temporal variation at the individual level and discrimination of inter- and intra-individual variation.

664
